# Supplementary material for: Differential expression pattern of co-inhibitory molecules on CD4+ T cells in uncomplicated versus complicated malaria
Source: PubMed Central journal article supplement (PMC5859076; doi:10.1038/s41598-018-22659-1), 2018-03-19
Supplement: 41598_2018_22659_MOESM1_ESM.pdf [file 41598_2018_22659_MOESM1_ESM.pdf]

# **Supplemental information**

## **Differential expression pattern of co-inhibitory molecules on CD4<sup>+</sup> T cells in uncomplicated versus complicated malaria**

Annemieke Abel, Christiane Steeg, Francis Aminkiah, Otchere Addai-Mensah, Marylyn Addo, Nicola Gagliani, Christian Casar, Denis Dekugmen Yar, Ellis Owusu-Dabo, Thomas Jacobs, Maria Sophia Mackroth

**Suppl. Tab. 1: Detailed information about study participants, separated according to the four study groups**

**A**

| ID     | Group | age | sex    | rapid test | microscope | parasitemia |
|--------|-------|-----|--------|------------|------------|-------------|
| 1      | OP    | 6   | male   | positive   | positive   | 0.6         |
| 2      | OP    | 9   | female | positive   | positive   | 2.7         |
| 3      | OP    | 3   | male   | positive   | positive   | 0.5         |
| 4      | OP    | 1   | female | positive   | positive   | 0.3         |
| 5      | OP    | 9   | female | positive   | positive   | 0.6         |
| 6      | OP    | 6   | male   | positive   | -          | -           |
| 7      | OP    | 8   | male   | positive   | positive   | 0.6         |
| 8      | OP    | 4   | male   | positive   | positive   | 0.1         |
| 9      | OP    | 6   | female | positive   | -          | -           |
| 11     | OP    | 4   | male   | positive   | Positive   | 5.7         |
| 12     | OP    | 6   | female | positive   | -          | -           |
| 13     | OP    | 2   | male   | positive   | positive   | 0.7         |
| 14     | OP    | 6   | female | positive   | positive   | 0.3         |
| 15     | OP    | 5   | female | positive   | positive   | 2.6         |
| 16     | OP    | 8   | female | positive   | positive   | 1.5         |
| 17     | OP    | 4   | female | positive   | positive   | 0.7         |
| 18     | OP    | 2   | male   | positive   | positive   | 1.5         |
| 19     | OP    | 9   | male   | positive   | positive   | 2.7         |
| 20     | OP    | 8   | female | positive   | positive   | 4.5         |
| 21     | OP    | 7   | female | positive   | positive   | 1.3         |
| 22     | OP    | 2   | male   | positive   | -          | -           |
| 23     | OP    | 3   | female | positive   | -          | -           |
| 24     | OP    | 5   | female | positive   | -          | -           |
| 25     | OP    | 2   | female | positive   | -          | -           |
| 26     | OP    | 9   | female | positive   | positive   | 2.5         |
| 27     | OP    | 5   | male   | positive   | positive   | 0.2         |
| 28     | OP    | 8   | female | positive   | positive   | 0.2         |
| 29     | OP    | 10  | female | positive   | positive   | 1.7         |
| 30     | OP    | 2   | male   | positive   | positive   | 0.8         |
| OPD +1 | OP    | 10  | male   | positive   | -          | -           |
| OPD +2 | OP    | 7   | female | positive   | positive   | 0.3         |
| OPD +3 | OP    | 5   | male   | positive   | positive   | 1.8         |

**B**

| ID | group | age | sex    | rapid test | microscope | parasitemia |
|----|-------|-----|--------|------------|------------|-------------|
| 31 | IP    | 7   | female | positive   | positive   | 17.3        |
| 32 | IP    | 4   | female | positive   | positive   | 9.4         |
| 33 | IP    | 1   | male   | positive   | positive   | 8.8         |
| 34 | IP    | 4   | male   | positive   | positive   | 3.6         |
| 35 | IP    | 9   | male   | positive   | positive   | 5.3         |
| 36 | IP    | 9   | female | positive   | positive   | 2.5         |
| 37 | IP    | 3   | female | positive   | positive   | 3.5         |
| 38 | IP    | 4   | male   | positive   | positive   | 2.4         |
| 39 | IP    | 2   | male   | positive   | positive   | 3.6         |
| 40 | IP    | 4   | male   | positive   | -          | -           |
| 41 | IP    | 4   | male   | positive   | positive   | 0.5         |
| 42 | IP    | 6   | female | positive   | positive   | 0.2         |
| 43 | IP    | 4   | female | positive   | positive   | 10.0        |
| 44 | IP    | 4   | female | positive   | positive   | 2.9         |
| 45 | IP    | 7   | male   | positive   | positive   | 3.8         |
| 46 | IP    | 8   | female | positive   | positive   | 5.1         |
| 47 | IP    | 2   | male   | positive   | positive   | 4.6         |
| 48 | IP    | 2   | male   | positive   | positive   | 1.6         |
| 49 | IP    | -   | -      | positive   | -          | -           |
| 50 | IP    | 1   | female | positive   | positive   | 1.0         |
| 51 | IP    | 6   | male   | positive   | positive   | 9.9         |
| 52 | IP    | 2   | female | positive   | positive   | 13.0        |
| 53 | IP    | 2   | male   | positive   | positive   | 2.3         |
| 54 | IP    | 10  | female | positive   | -          | -           |
| 55 | IP    | 7   | male   | positive   | positive   | 1.1         |
| 56 | IP    | 2   | female | positive   | -          | -           |
| 57 | IP    | 3   | female | positive   | -          | -           |
| 58 | IP    | 4   | female | positive   | -          | -           |
| 59 | IP    | 8   | male   | positive   | positive   | 0.3         |
| 60 | IP    | 1   | female | positive   | positive   | 1.8         |
| 61 | IP    | 6   | male   | positive   | positive   | 1.7         |
| 62 | IP    | 6   | male   | positive   | -          | -           |
| 63 | IP    | 5   | male   | positive   | positive   | 4.9         |
| 64 | IP    | 12  | female | positive   | positive   | 2.7         |
| 65 | IP    | 1   | male   | positive   | positive   | 1.9         |

**C**

| ID  | group | age | sex    | rapid test | microscope | parasitemia |
|-----|-------|-----|--------|------------|------------|-------------|
| 101 | HC    | 10  | male   | negative   | -          | -           |
| 103 | HC    | 7   | male   | negative   | -          | -           |
| 104 | HC    | 7   | male   | negative   | -          | -           |
| 105 | HC    | 6   | male   | negative   | -          | -           |
| 112 | HC    | 7   | female | negative   | -          | -           |
| 113 | HC    | 8   | male   | negative   | -          | -           |
| 117 | HC    | 8   | female | negative   | -          | -           |
| 120 | HC    | 8   | female | negative   | -          | -           |
| 122 | HC    | 9   | male   | negative   | -          | -           |
| 124 | HC    | 10  | female | negative   | -          | -           |
| 126 | HC    | 8   | female | negative   | -          | -           |
| 129 | HC    | 10  | male   | negative   | -          | -           |
| 132 | HC    | 9   | female | negative   | -          | -           |
| 136 | HC    | 9   | female | negative   | -          | -           |
| 137 | HC    | 9   | female | negative   | -          | -           |
| 140 | HC    | 8   | female | negative   | -          | -           |
| 142 | HC    | 11  | female | negative   | -          | -           |
| 150 | HC    | 9   | female | negative   | -          | -           |
| 153 | HC    | 9   | male   | negative   | -          | -           |
| 154 | HC    | 9   | male   | negative   | -          | -           |
| 158 | HC    | 10  | female | negative   | -          | -           |
| 161 | HC    | 9   | female | negative   | -          | -           |
| 162 | HC    | 10  | female | negative   | -          | -           |
| 164 | HC    | 7   | female | negative   | -          | -           |
| 166 | HC    | 6   | female | negative   | -          | -           |
| 168 | HC    | 9   | male   | negative   | negative   | 0           |
| 172 | HC    | 8   | male   | negative   | negative   | 0           |
| 173 | HC    | 5   | male   | negative   | -          | -           |
| 174 | HC    | 6   | female | negative   | -          | -           |
| 183 | HC    | 8   | female | negative   | -          | -           |
| 193 | HC    | 10  | female | negative   | -          | -           |
| 201 | HC    | 9   | female | negative   | -          | -           |
| 202 | HC    | 8   | female | negative   | -          | -           |
| 205 | HC    | 8   | female | negative   | -          | -           |
| 206 | HC    | 9   | female | negative   | -          | -           |
| 211 | HC    | 8   | female | negative   | -          | -           |
| 219 | HC    | 8   | female | negative   | -          | -           |
| 223 | HC    | 10  | female | negative   | -          | -           |
| 224 | HC    | 10  | male   | negative   | -          | -           |
| 227 | HC    | 10  | female | negative   | -          | -           |
| 232 | HC    | 9   | male   | negative   | -          | -           |

| D | ID   | group | age | sex    | rapid test | microscope | parasitemia |
|---|------|-------|-----|--------|------------|------------|-------------|
|   | 108  | AS    | 10  | male   | positive   | negative   | 0.0         |
|   | 109  | AS    | 9   | male   | positive   | positive   | 0.1         |
|   | 110  | AS    | 10  | female | positive   | positive   | 0.4         |
|   | 111  | AS    | 7   | female | positive   | negative   | 0.0         |
|   | 114  | AS    | 9   | male   | positive   | positive   | 0.1         |
|   | 118A | AS    | 6   | male   | positive   | positive   | 0.1         |
|   | 118B | AS    | 9   | male   | positive   | positive   | 0.2         |
|   | 127  | AS    | 10  | female | positive   | positive   | 0.2         |
|   | 128  | AS    | 10  | female | positive   | positive   | 0.3         |
|   | 131  | AS    | 10  | female | positive   | negative   | 0.0         |
|   | 135  | AS    | 10  | female | positive   | negative   | 0.0         |
|   | 138  | AS    | 11  | male   | positive   | negative   | 0.0         |
|   | 139  | AS    | 11  | female | positive   | positive   | 0.3         |
|   | 143  | AS    | 11  | female | positive   | negative   | 0.0         |
|   | 144  | AS    | 9   | male   | positive   | positive   | 0.1         |
|   | 145  | AS    | 9   | female | positive   | negative   | 0.0         |
|   | 148  | AS    | 10  | female | positive   | negative   | 0.0         |
|   | 152  | AS    | 9   | female | positive   | negative   | 0.0         |
|   | 155  | AS    | 11  | male   | positive   | negative   | 0.0         |
|   | 156  | AS    | 10  | male   | positive   | negative   | 0.0         |
|   | 159  | AS    | 11  | female | positive   | negative   | 0.0         |
|   | 167  | AS    | 9   | male   | positive   | negative   | 0.0         |
|   | 169  | AS    | 6   | female | positive   | positive   | 0.3         |
|   | 170  | AS    | 7   | female | positive   | positive   | 0.1         |
|   | 181  | AS    | 8   | female | positive   | negative   | 0.0         |
|   | 185  | AS    | 8   | female | positive   | negative   | 0.0         |
|   | 189  | AS    | 9   | female | positive   | negative   | 0.0         |
|   | 190  | AS    | 10  | female | positive   | negative   | 0.0         |
|   | 191  | AS    | 10  | female | positive   | negative   | 0.0         |
|   | 195  | AS    | 7   | male   | positive   | negative   | 0.0         |
|   | 196  | AS    | 8   | male   | positive   | negative   | 0.0         |
|   | 199  | AS    | 10  | female | positive   | positive   | 0.1         |
|   | 200  | AS    | 8   | female | positive   | positive   | 0.2         |
|   | 203  | AS    | 8   | female | positive   | negative   | 0.0         |
|   | 209  | AS    | 11  | male   | positive   | positive   | 0.2         |
|   | 212  | AS    | 10  | male   | positive   | negative   | 0.0         |
|   | 213  | AS    | 10  | male   | positive   | negative   | 0.0         |
|   | 216  | AS    | 7   | female | positive   | negative   | 0.0         |
|   | 218  | AS    | 9   | female | positive   | negative   | 0.0         |
|   | 222  | AS    | 10  | male   | positive   | negative   | 0.0         |
|   | 238  | AS    | 8   | male   | positive   | positive   | 0.1         |

**Suppl. Tab. 2: Correlarion matrices of plasma cytokines.** Data was compiled with EXCEL correlation analysis. Seperated tables for all groups taken together, and all four groups HC, AS, OP, and IP themselves are displayed. Values marked green represent statistically significant correlations between two cytokines confirmed by regression analysis.

| <b>all</b>            | <i>IFN-γ [pg/mL]</i> | <i>TNF-α [pg/mL]</i> | <i>IL-6 [pg/mL]</i> | <i>IL-10 [pg/mL]</i> | <i>IL-2 [pg/mL]</i> | <i>IL-17A [pg/mL]</i> | <i>IL-17F [pg/mL]</i> |
|-----------------------|----------------------|----------------------|---------------------|----------------------|---------------------|-----------------------|-----------------------|
| <i>IFN-γ [pg/mL]</i>  | 1                    | 0,12                 | 0,17                | 0,15                 | 0,10                | 0,15                  | 0,09                  |
| <i>TNF-α [pg/mL]</i>  | 0,12                 | 1                    | 0,03                | 0,02                 | 0,72                | 0,21                  | 0,43                  |
| <i>IL-6 [pg/mL]</i>   | 0,17                 | 0,03                 | 1                   | 0,06                 | 0,02                | -0,05                 | -0,01                 |
| <i>IL-10 [pg/mL]</i>  | 0,15                 | 0,02                 | 0,06                | 1                    | 0,03                | 0,17                  | -0,13                 |
| <i>IL-2 [pg/mL]</i>   | 0,10                 | 0,72                 | 0,02                | 0,03                 | 1                   | 0,10                  | 0,32                  |
| <i>IL-17A [pg/mL]</i> | 0,15                 | 0,21                 | -0,05               | 0,17                 | 0,10                | 1                     | 0,14                  |
| <i>IL-17F [pg/mL]</i> | 0,09                 | 0,43                 | -0,01               | -0,13                | 0,32                | 0,14                  | 1                     |

| <b>HC</b>             | <i>IFN-γ [pg/mL]</i> | <i>TNF-α [pg/mL]</i> | <i>IL-6 [pg/mL]</i> | <i>IL-10 [pg/mL]</i> | <i>IL-2 [pg/mL]</i> | <i>IL-17A [pg/mL]</i> | <i>IL-17F [pg/mL]</i> |
|-----------------------|----------------------|----------------------|---------------------|----------------------|---------------------|-----------------------|-----------------------|
| <i>IFN-γ [pg/mL]</i>  | 1                    | 0,50                 | 0,68                | 0,66                 | 0,44                | 0,57                  | 0,13                  |
| <i>TNF-α [pg/mL]</i>  | 0,50                 | 1                    | 0,84                | 0,85                 | 0,96                | 0,54                  | 0,22                  |
| <i>IL-6 [pg/mL]</i>   | 0,68                 | 0,84                 | 1                   | 0,98                 | 0,73                | 0,84                  | 0,18                  |
| <i>IL-10 [pg/mL]</i>  | 0,66                 | 0,85                 | 0,98                | 1                    | 0,75                | 0,81                  | 0,17                  |
| <i>IL-2 [pg/mL]</i>   | 0,44                 | 0,96                 | 0,73                | 0,75                 | 1                   | 0,44                  | 0,25                  |
| <i>IL-17A [pg/mL]</i> | 0,57                 | 0,54                 | 0,84                | 0,81                 | 0,44                | 1                     | 0,24                  |
| <i>IL-17F [pg/mL]</i> | 0,13                 | 0,22                 | 0,18                | 0,17                 | 0,25                | 0,24                  | 1                     |

| <b>AS</b>             | <i>IFN-γ [pg/mL]</i> | <i>TNF-α [pg/mL]</i> | <i>IL-6 [pg/mL]</i> | <i>IL-10 [pg/mL]</i> | <i>IL-2 [pg/mL]</i> | <i>IL-17A [pg/mL]</i> | <i>IL-17F [pg/mL]</i> |
|-----------------------|----------------------|----------------------|---------------------|----------------------|---------------------|-----------------------|-----------------------|
| <i>IFN-γ [pg/mL]</i>  | 1                    | -0,02                | 0,33                | 0,55                 | -0,11               | 0,23                  | 0,42                  |
| <i>TNF-α [pg/mL]</i>  | -0,02                | 1                    | -0,11               | 0,54                 | 0,03                | -0,33                 | 0,13                  |
| <i>IL-6 [pg/mL]</i>   | 0,33                 | -0,11                | 1                   | 0,04                 | 0,10                | 0,09                  | 0,26                  |
| <i>IL-10 [pg/mL]</i>  | 0,55                 | 0,54                 | 0,04                | 1                    | -0,02               | -0,26                 | 0,18                  |
| <i>IL-2 [pg/mL]</i>   | -0,11                | 0,03                 | 0,10                | -0,02                | 1                   | 0,06                  | -0,04                 |
| <i>IL-17A [pg/mL]</i> | 0,23                 | -0,33                | 0,09                | -0,26                | 0,06                | 1                     | 0,10                  |
| <i>IL-17F [pg/mL]</i> | 0,42                 | 0,13                 | 0,26                | 0,18                 | -0,04               | 0,10                  | 1                     |

| <b>OP</b>             | <i>IFN-γ [pg/mL]</i> | <i>TNF-α [pg/mL]</i> | <i>IL-6 [pg/mL]</i> | <i>IL-10 [pg/mL]</i> | <i>IL-2 [pg/mL]</i> | <i>IL-17A [pg/mL]</i> | <i>IL-17F [pg/mL]</i> |
|-----------------------|----------------------|----------------------|---------------------|----------------------|---------------------|-----------------------|-----------------------|
| <i>IFN-γ [pg/mL]</i>  | 1                    | 0,02                 | -0,09               | 0,05                 | 0,07                | 0,14                  | -0,07                 |
| <i>TNF-α [pg/mL]</i>  | 0,02                 | 1                    | -0,07               | -0,10                | 0,90                | 0,09                  | 0,72                  |
| <i>IL-6 [pg/mL]</i>   | -0,09                | -0,07                | 1                   | -0,16                | -0,15               | -0,01                 | 0,10                  |
| <i>IL-10 [pg/mL]</i>  | 0,05                 | -0,10                | -0,16               | 1                    | -0,16               | 0,21                  | -0,21                 |
| <i>IL-2 [pg/mL]</i>   | 0,07                 | 0,90                 | -0,15               | -0,16                | 1                   | 0,04                  | 0,75                  |
| <i>IL-17A [pg/mL]</i> | 0,14                 | 0,09                 | -0,01               | 0,21                 | 0,04                | 1                     | 0,05                  |
| <i>IL-17F [pg/mL]</i> | -0,07                | 0,72                 | 0,10                | -0,21                | 0,75                | 0,05                  | 1                     |

| <b>IP</b>             | <i>IFN-γ [pg/mL]</i> | <i>TNF-α [pg/mL]</i> | <i>IL-6 [pg/mL]</i> | <i>IL-10 [pg/mL]</i> | <i>IL-2 [pg/mL]</i> | <i>IL-17A [pg/mL]</i> | <i>IL-17F [pg/mL]</i> |
|-----------------------|----------------------|----------------------|---------------------|----------------------|---------------------|-----------------------|-----------------------|
| <i>IFN-γ [pg/mL]</i>  | 1                    | 0,50                 | 0,07                | -0,13                | -0,05               | 0,34                  | 0,55                  |
| <i>TNF-α [pg/mL]</i>  | 0,50                 | 1                    | 0,08                | -0,23                | -0,02               | 0,41                  | 0,65                  |
| <i>IL-6 [pg/mL]</i>   | 0,07                 | 0,08                 | 1                   | -0,17                | -0,01               | -0,11                 | -0,03                 |
| <i>IL-10 [pg/mL]</i>  | -0,13                | -0,23                | -0,17               | 1                    | -0,01               | 0,29                  | -0,24                 |
| <i>IL-2 [pg/mL]</i>   | -0,05                | -0,02                | -0,01               | -0,01                | 1                   | 0,02                  | 0,04                  |
| <i>IL-17A [pg/mL]</i> | 0,34                 | 0,41                 | -0,11               | 0,29                 | 0,02                | 1                     | 0,14                  |
| <i>IL-17F [pg/mL]</i> | 0,55                 | 0,65                 | -0,03               | -0,24                | 0,04                | 0,14                  | 1                     |

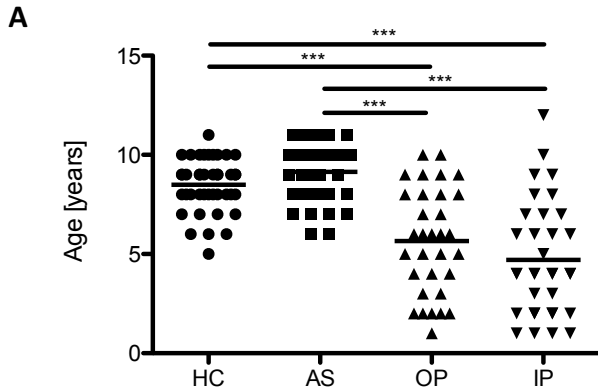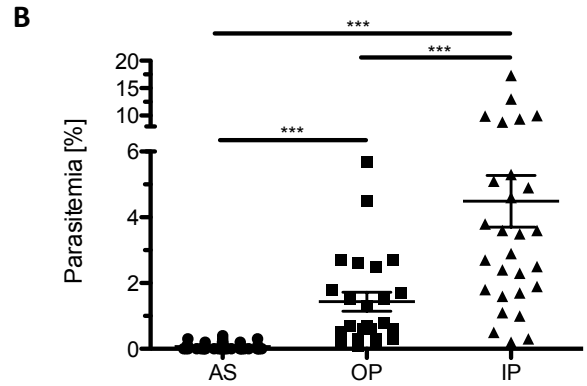

**Supplemental Figure S1: Characteristics of study participants.** A) Information was given by parents/legal guardians. One-way ANOVA with Tukey's Multiple Comparison Test was conducted to determine potential statistical differences. (HC n= 41; AS n= 41; OP n= 32; IP n= 34) B) Parasitemia was determined by thin blood smears stained with 4% Giemsa and examined under oil immersion (original magnification x 100). In order to determine statistically significant differences, Mann-Whitney U Test was used. (AS n= 41; OP n= 24; IP n= 28)

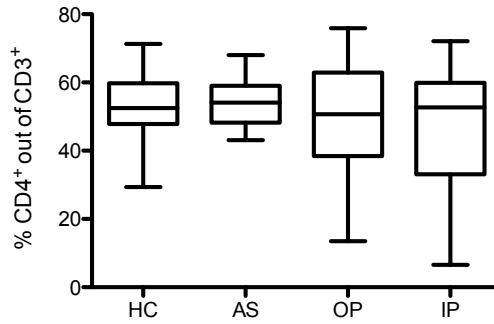

**Supplemental Figure S2: No changes in CD4 counts after *Plasmodium falciparum* infection.** Blood samples from patients and healthy controls were ex vivo analyzed for the expression of CD3 and CD4 by flow cytometry. Potential statistically significant differences were determined by One-way ANOVA with Tukey's Multiple Comparison Test. (HC n= 37; AS n= 40; OP n= 27; IP n= 31).





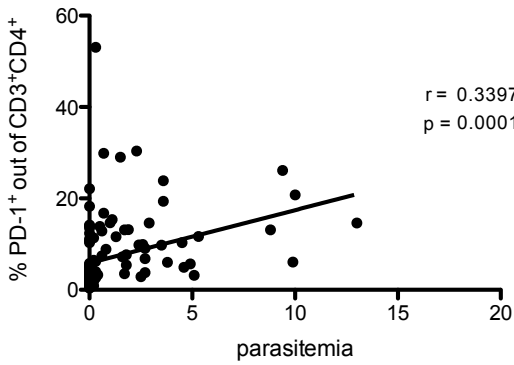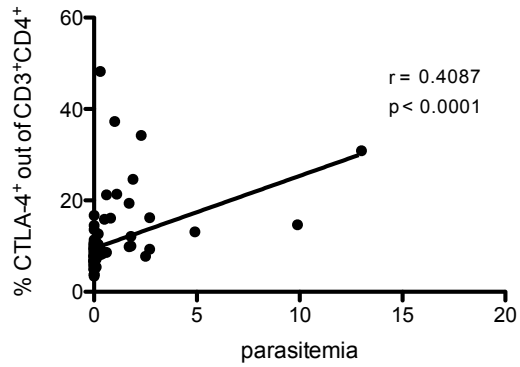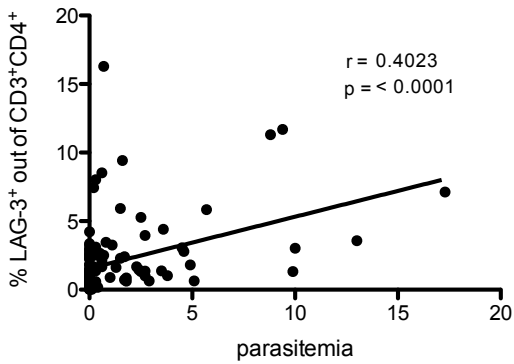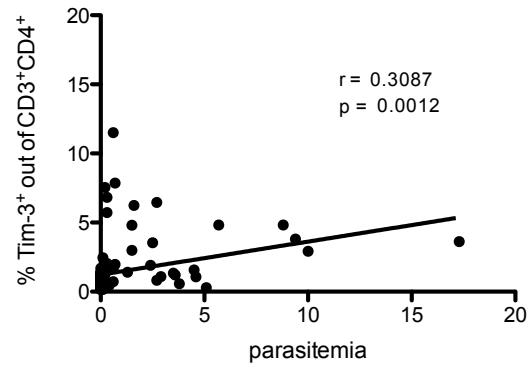

**Supplemental Figure S4: Expression of co-inhibitory molecules does not correlate with parasitemia.** Percentages of CD4<sup>+</sup> T cells expressing one of the co-inhibitory molecules analyzed were plotted against parasitemia of all study groups. Correlation was analyzed with Pearson correlation. (PD-1 n= 120; CTLA-4 n= 80; LAG-3 n= 125; Tim-3 n= 108).

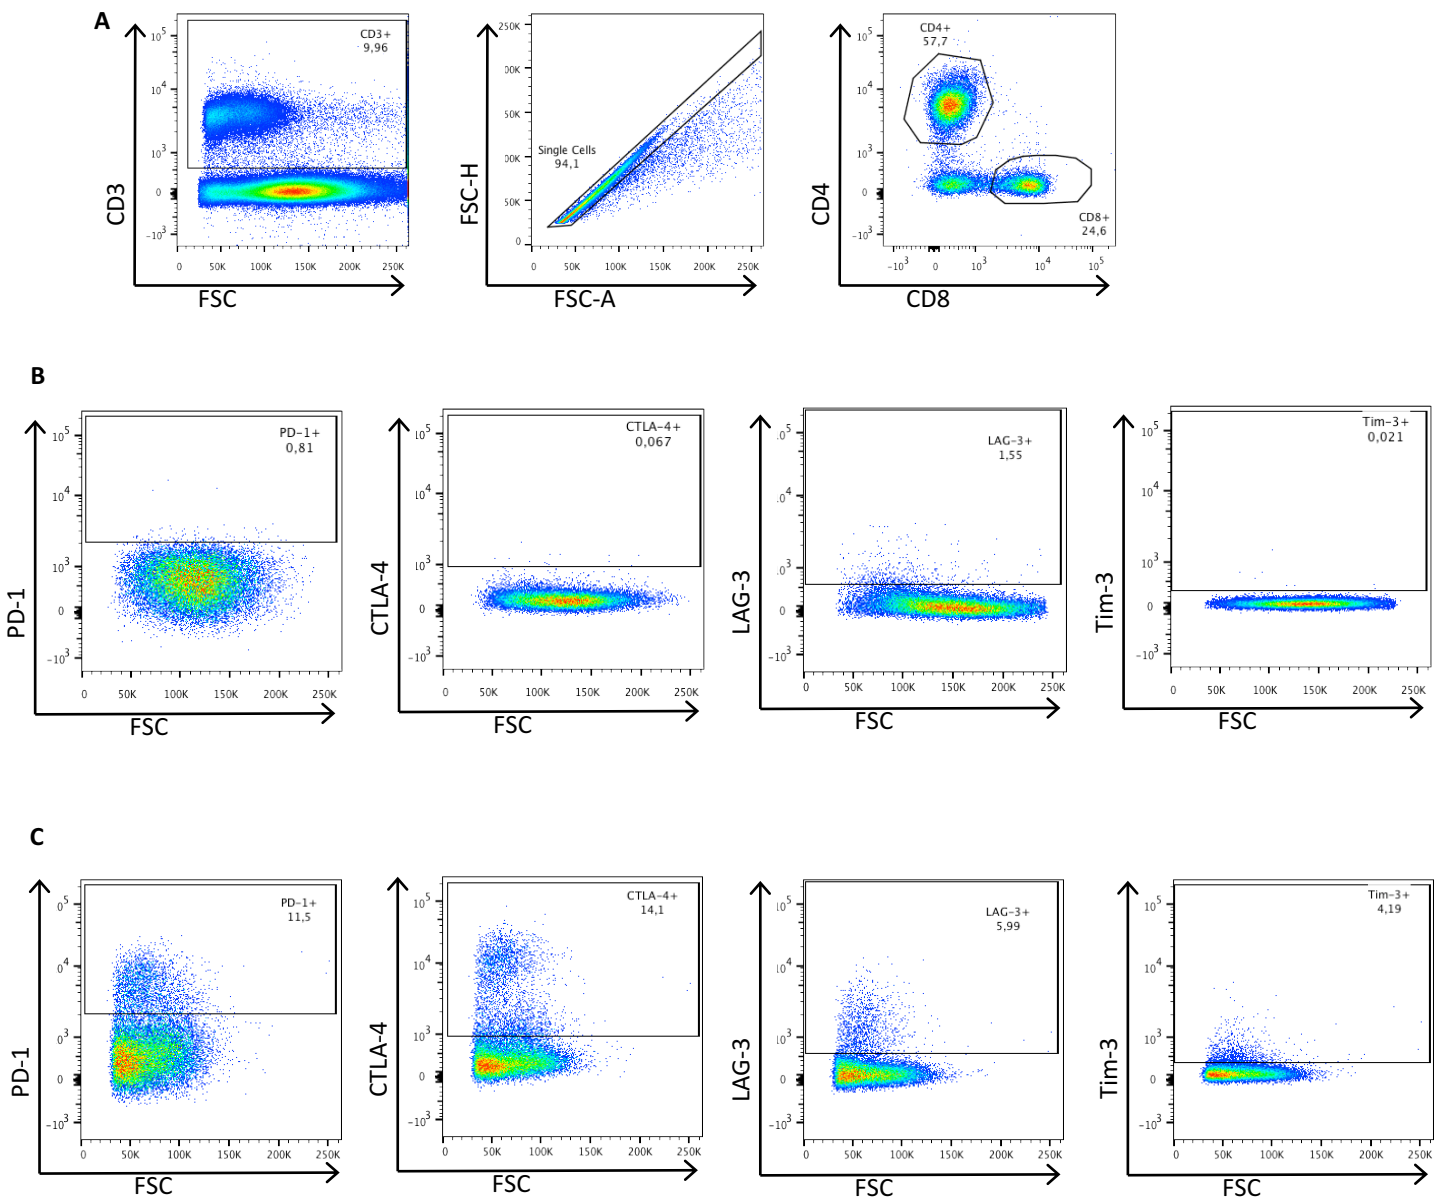

**Supplemental Figure S5: Gating strategy and stainings for co-inhibitory molecules.** A) Gating strategy gating for CD3<sup>+</sup> cells, single cells, and CD4<sup>+</sup>/CD8<sup>+</sup> cells, applied to all flow cytometric analyzes. B) Dotplots for FMO stainings of PD-1, CTLA-4, LAG-3, and Tim-3 on CD4<sup>+</sup> T cells. C) Exemplary stainings for the co-inhibitory molecules PD-1, CTLA-4, LAG-3, and Tim-3 for one representative OP child.

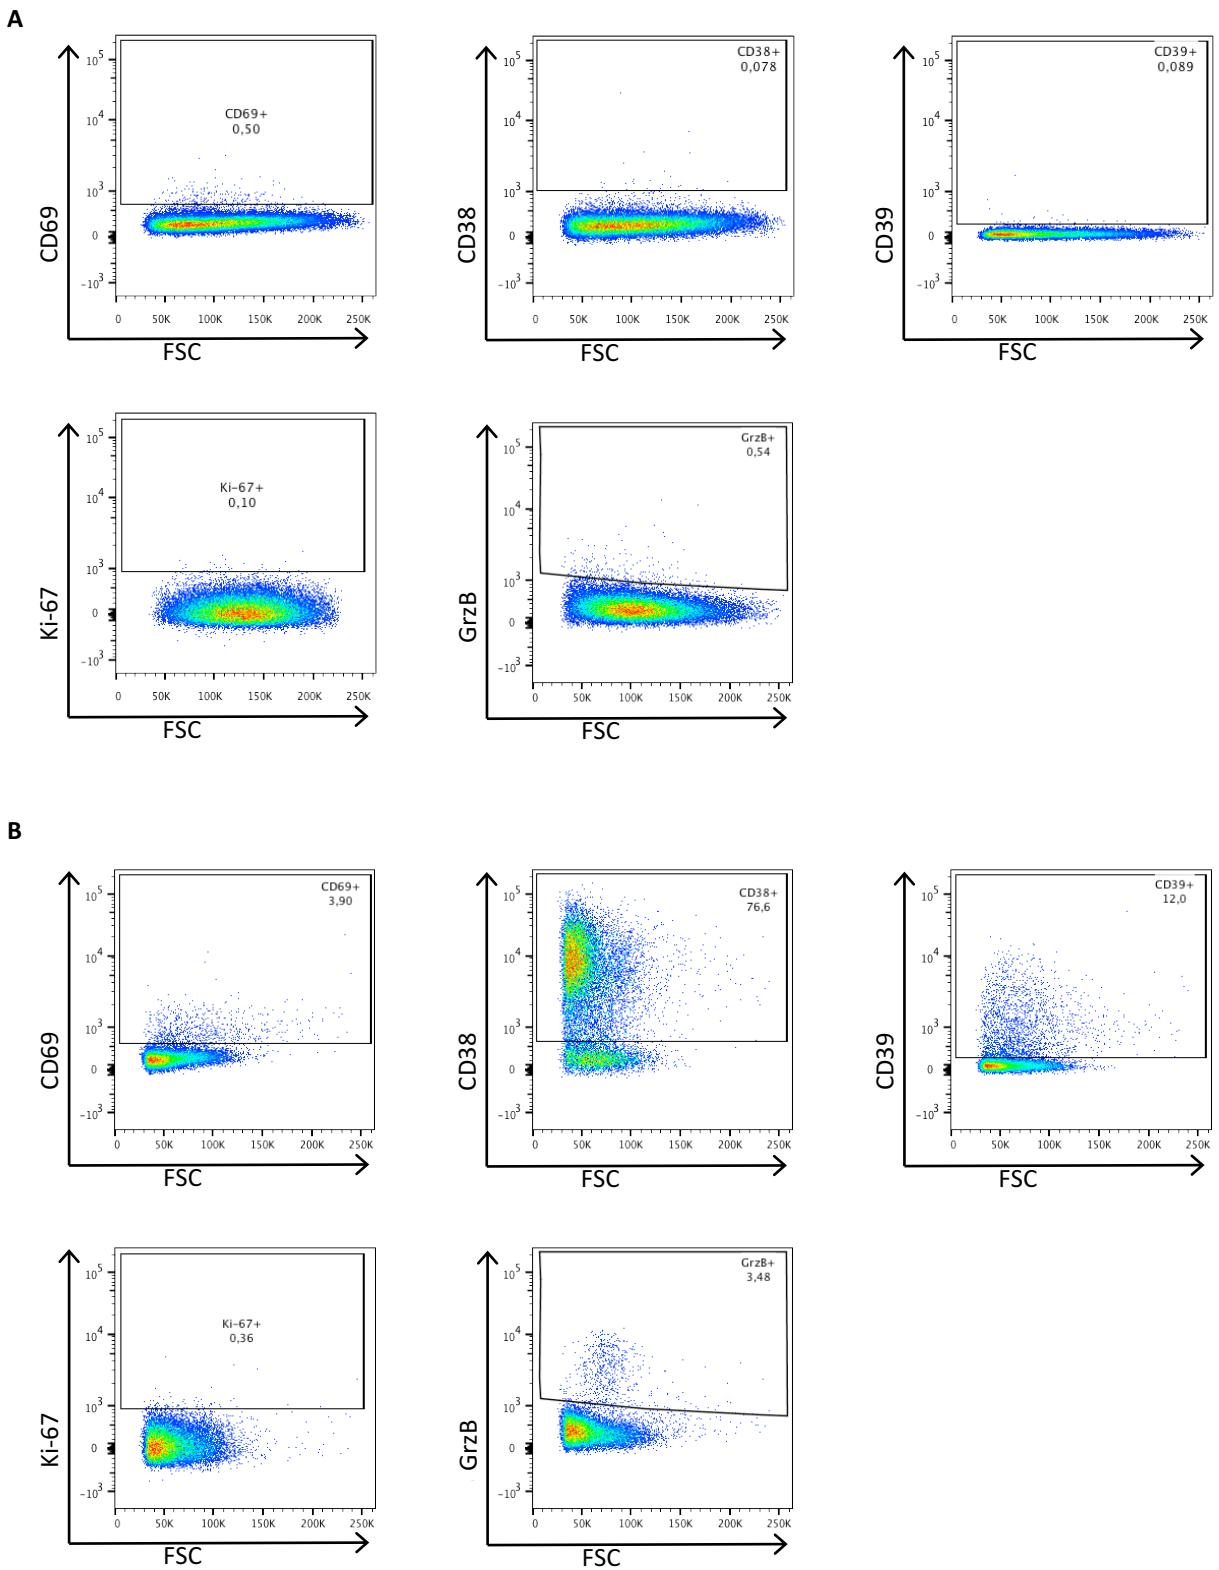

**Supplemental Figure S6: Flow cytometry stainings for CD69, CD38, CD39, Ki-67, and Granzyme B on CD4<sup>+</sup> T cells. A) FMOs of CD69, CD38, CD39, Ki-67, and Granzyme B on CD4<sup>+</sup> T cells gated as demonstrated in Supplemental Figure S2. B) Dotplots show exemplary staining for CD69, CD38, CD39, Ki-67, and Granzyme B for one representative OP child.**
